CORRECTION

# Correction: Deep Evolutionary Comparison of Gene Expression Identifies Parallel Recruitment of *Trans*-Factors in Two Independent Origins of C<sub>4</sub> Photosynthesis

Sylvain Aubry, Steven Kelly, Britta M. C. Kümpers, Richard D. Smith-Unna, Julian M. Hibberd

There is an error in the first sentence of the Materials and Methods. The correct sentence is: *C. gynandra* was grown in soil under long-day conditions in a cabinet with light intensity of 350  $\mu\text{mol photons m}^{-2} \text{s}^{-1}$  and a temperature of daytime 23°C/20°C.

## Reference

1. Aubry S, Kelly S, Kümpers BMC, Smith-Unna RD, Hibberd JM (2014) Deep Evolutionary Comparison of Gene Expression Identifies Parallel Recruitment of *Trans*-Factors in Two Independent Origins of C<sub>4</sub> Photosynthesis. PLoS Genet 10(6): e1004365. doi: [10.1371/journal.pgen.1004365](https://doi.org/10.1371/journal.pgen.1004365) PMID: [24901697](https://pubmed.ncbi.nlm.nih.gov/24901697/)

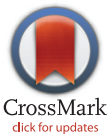

## OPEN ACCESS

**Citation:** Aubry S, Kelly S, Kümpers BMC, Smith-Unna RD, Hibberd JM (2016) Correction: Deep Evolutionary Comparison of Gene Expression Identifies Parallel Recruitment of *Trans*-Factors in Two Independent Origins of C<sub>4</sub> Photosynthesis. PLoS Genet 12(5): e1006087. doi:10.1371/journal.pgen.1006087

**Published:** May 24, 2016

**Copyright:** © 2016 Aubry et al. This is an open access article distributed under the terms of the [Creative Commons Attribution License](https://creativecommons.org/licenses/by/4.0/), which permits unrestricted use, distribution, and reproduction in any medium, provided the original author and source are credited.
